# Supplementary material for: Platinum catalyzed sequential hydroboration of decaborane: a facile approach to poly(alkenyldecaborane) with decaborane in the mainchain
Source: Royal Society of Chemistry journal article supplement (doi:10.1039/c3cc49203f), 2014-01-01

**Platinum catalyzed sequential hydroboration of decaborane: a facile approach to poly(alkenyldecaborane) with decaborane in mainchain**

Xing-Hua Yu<sup>a</sup>, Ke Cao<sup>a,\*</sup>, Yawen Huang<sup>a</sup>, Junxiao Yang<sup>a,\*</sup>, Jing Li<sup>b</sup> and Guanjun Chang<sup>a</sup>

<sup>a</sup> *School of Materials Science and Engineering & State Key Laboratory Cultivation Base for Nonmetal Composite and Functional Materials, Southwest University of Science and Technology, Mianyang, 621010, P. R. China*

<sup>b</sup> *Research Center of Laser Fusion, China Academy of Engineering Physics, Mianyang, Sichuan, 621900, P. R. China*

Email: [caoke@swust.edu.cn](mailto:caoke@swust.edu.cn), [yangjunxiao@swust.edu.cn](mailto:yangjunxiao@swust.edu.cn)

## Context

1. General information
2. Experimental
3. Spectroscopic data for products
4. Copies of  $^1\text{H}$ NMR,  $^{11}\text{B}$ NMR and GPC

## 1. General information:

The materials were obtained from different commercial sources, and the toluene, benzene was dried and freshly distilled over sodium before used. All reactions under standard conditions were monitored by thin-layer chromatography (TLC) on gel F254 plates. The silica gel (300 - 400 meshes) is used for column chromatography, and the distillation range of petroleum ether is 60-90°C.  $^1\text{H}$  NMR and  $^{11}\text{B}$  NMR spectra were recorded on the Bruker 400MHz or 600MHz instruments. All  $^1\text{H}$  NMR spectral data are reported in *ppm* relative to tetramethylsilane (TMS) as internal standard, all  $^{11}\text{B}$  NMR spectral data are referenced to external  $\text{BF}_3 \cdot \text{Et}_2\text{O}$  (0.00ppm) with a negative sign indicating an upfield shift. Molecular weights of the polymers were determined by gel permeation chromatography (GPC) on a Wyatt DAWN HELEOS using tetrahydrofuran (THF) as an eluent under 38°C. Polymer solutions were prepared with ~5mg/mL concentrations in THF. A loop size of 50  $\mu\text{L}$  was employed, and makes each injection size 0.25mg. Thermogravimetric analysis (TGA) was carried out on a Thermal Analysis SDT Q600 Simultaneous DTA-TGA under a constant flow of 99.999% argon, alumina tube, heated at 10  $^\circ\text{C}/\text{min}$ .

## 2. Experimental

### 2.1 Synthesis of 6-hexenyldecaborane and 6-norbornenyldecaborane

The 6-hexenyldecaborane (HD) and 6-norbornenyldecaborane (ND) was synthesized according to the method reported by Sneddon and coworkers,<sup>[1]</sup> and gave the isolated yield with 78% and 81%, respectively.

6-hexenyldecaborane.  $^1\text{H}$  NMR (600MHz,  $\text{CDCl}_3$ , ppm):  $\delta$  5.86-5.76 (m, 1H), 5.03-4.94 (m, 2H), 2.11-2.06 (dd,  $J = 18\text{Hz}$ , 6Hz, 2H), 1.59-1.54 (m, 2H), 1.50-1.43 (m, 2H), 1.37 (br, 2H), -1.77(brs, 2H), -2.05(brs, 2H).

6-norbornenyldecaborane.  $^1\text{H}$  NMR (400MHz,  $\text{CDCl}_3$ , ppm):  $\delta$  6.18 (brs, 1H), 6.03 (brs, 1H), 2.99-2.96 (d,  $J = 18\text{Hz}$ , 2H), 1.74-1.72 (m, 1H), 1.43-1.39 (m, 1H), 1.37 (brs, 1H), 1.28(brs, 2H), -1.52 (s, 2H), -2.02 (s, 2H).

### 2.2 Synthesis of poly(6-hexenyldecaborane) (PHD)

To a dried Schlenk tube was sequentially added 6-hexenyldecaborane (100 mg, 0.4854 mmol), PtBr<sub>2</sub> (17.2 mg, 0.0485 mmol) and 0.1mL freshly distilled benzene, then the mixture was stirred at 100°C under N<sub>2</sub> for 48h. After cooled to room temperature, the mixture was diluted with CH<sub>2</sub>Cl<sub>2</sub> and filtered through a short silica gel column using CH<sub>2</sub>Cl<sub>2</sub> as eluent to remove the catalyst. After evaporation of the solvent, the residue was added to *n*-hexane dropwise, and the polymer was precipitated, after centrifugation and dried under vacuum, the PHD was afforded as creamy white solid with 35% yield (35mg). <sup>11</sup>B NMR (192.5MHz, CDCl<sub>3</sub>, ppm): δ 24.99, 10.59~8.97 (d), 1.33, -1.82~-2.48 (d), -33.64, -36.39, -38.41. <sup>1</sup>H NMR (400 MHz, CDCl<sub>3</sub>, ppm): 1.56 (s, 4H), 1.40-1.36 (m, 4H), 1.30-1.27 (m, 4H), -1.59 (br, 3BHB), -2.05 (br, 1BHB).

### 2.3 Synthesis of poly(6-norbornenyldecaborane) (PND)

poly(6-norbornenyldecaborane) was synthesized in a similar manner as described for PHD with 0.5mL benzene, and the PND was obtained as creamy white solid with 55% yield ( 55mg ). <sup>11</sup>B NMR (192.5MHz, CDCl<sub>3</sub>, ppm): δ 27.42, 12.84, 10.36, 8.85, 1.35, -3.19, -33.87, -36.56~-38.33. <sup>1</sup>H NMR (400 MHz, CDCl<sub>3</sub>, ppm): 2.48 (m, 2H), 1.73-1.43 (m, 6H), 1.27 (m, 2H), -1.62 (br, 2BHB), -2.04 (br, 2BHB).

# Copies of <sup>1</sup>HNMR/<sup>11</sup>BNMR/GPC

## <sup>1</sup>HNMR of HD

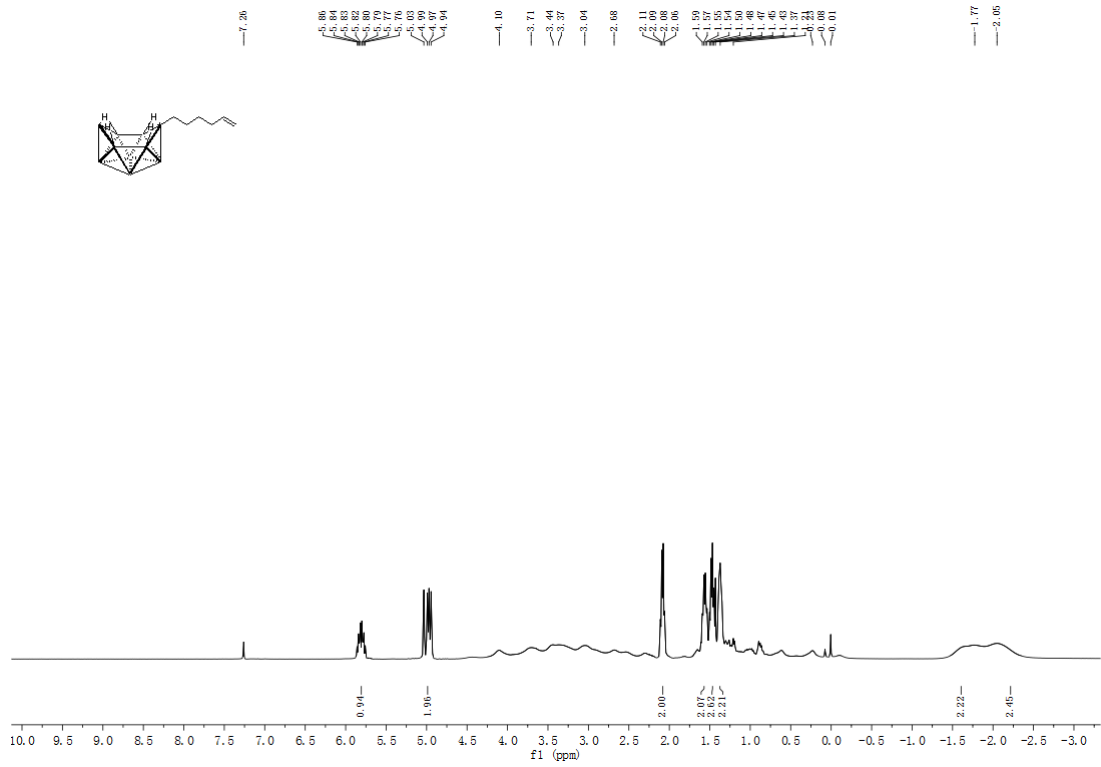

## <sup>1</sup>HNMR of ND

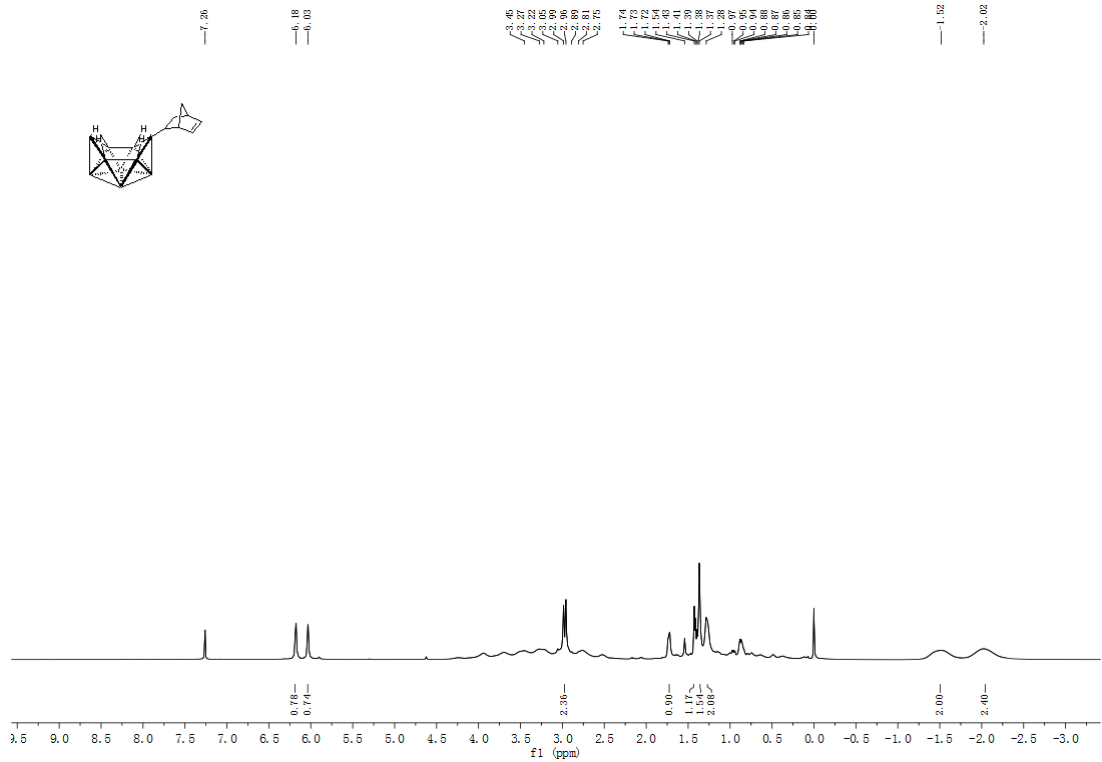

# <sup>1</sup>H NMR of PHD

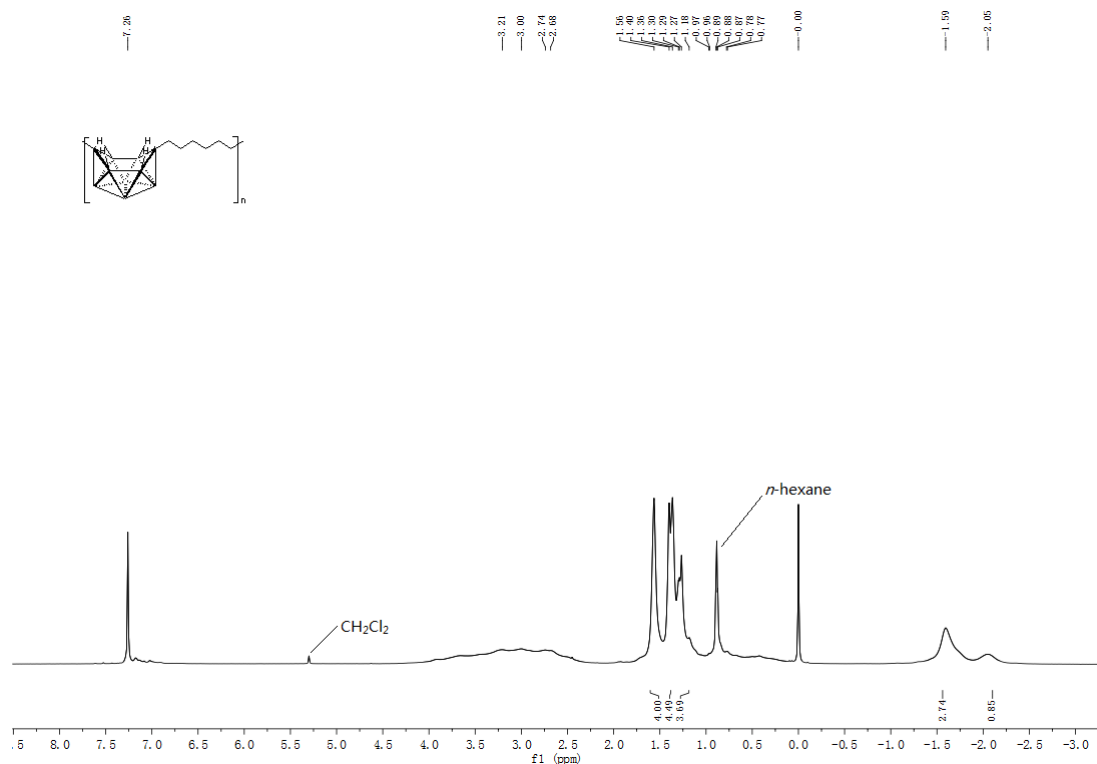

# <sup>11</sup>B NMR of PHD

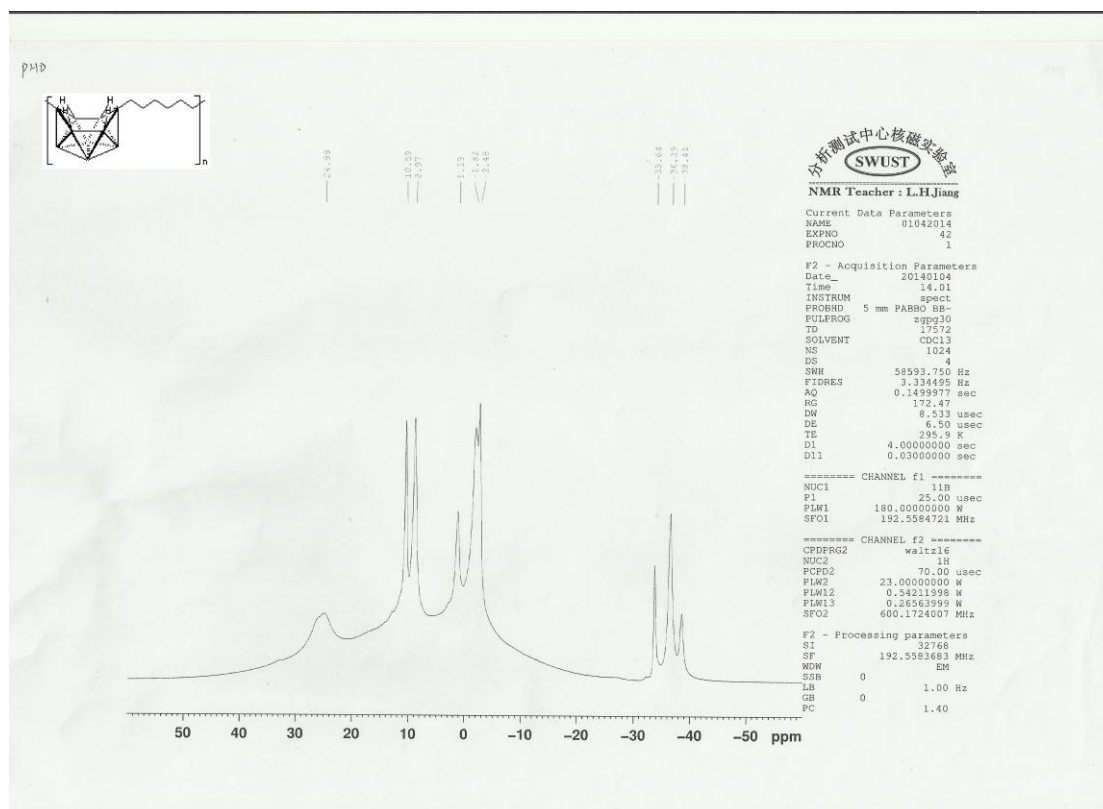

# <sup>1</sup>H NMR of PND

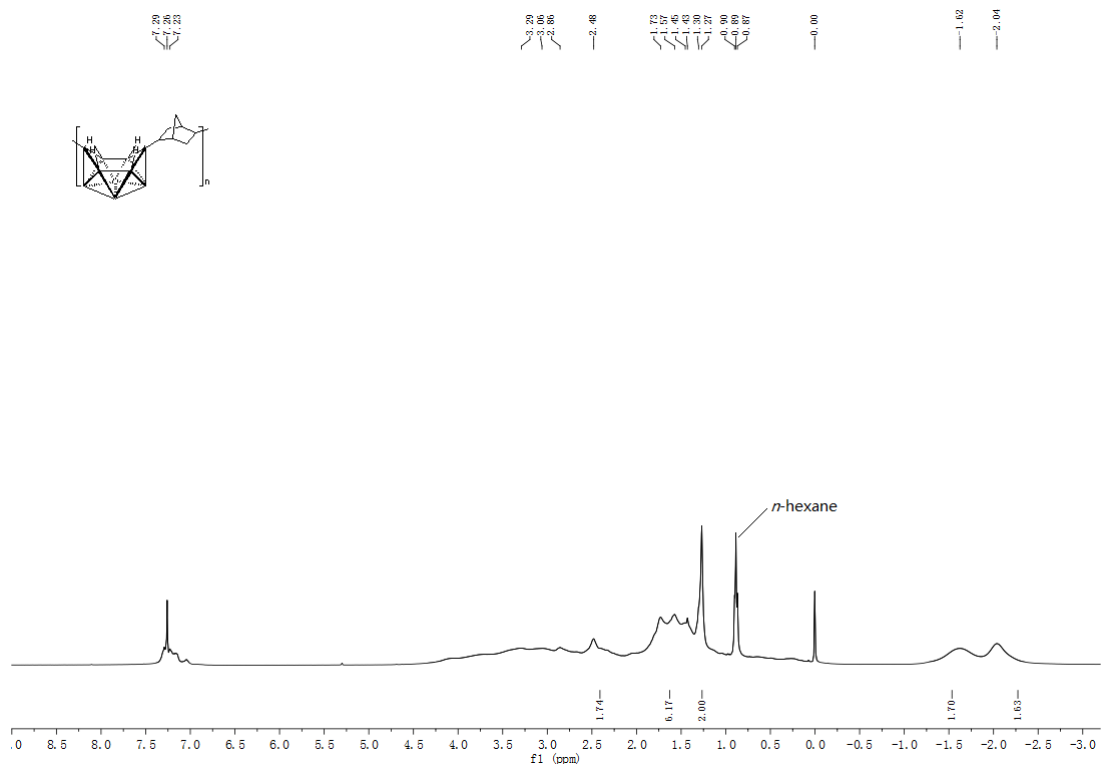

# <sup>11</sup>B NMR of PND

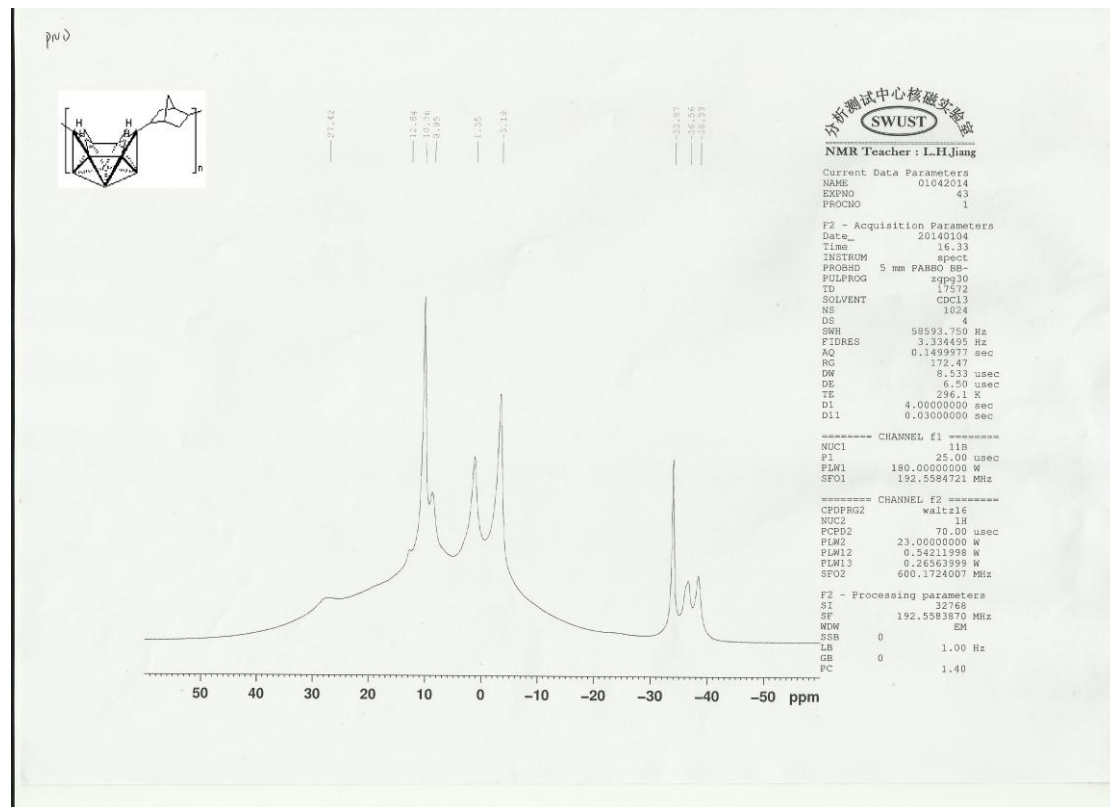

### GPC of PHD with 10mol% PtBr<sub>2</sub>

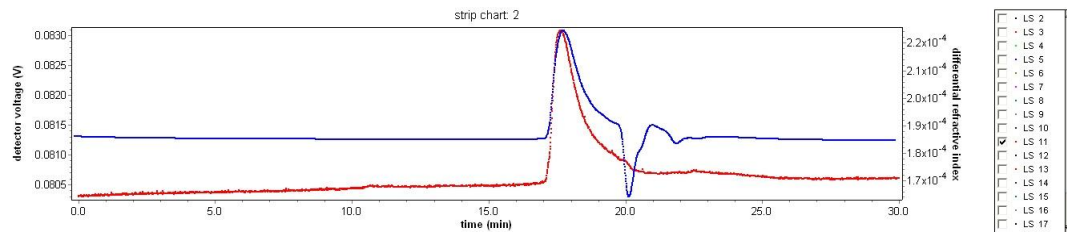

### GPC of PND with 5mol% PtBr<sub>2</sub>

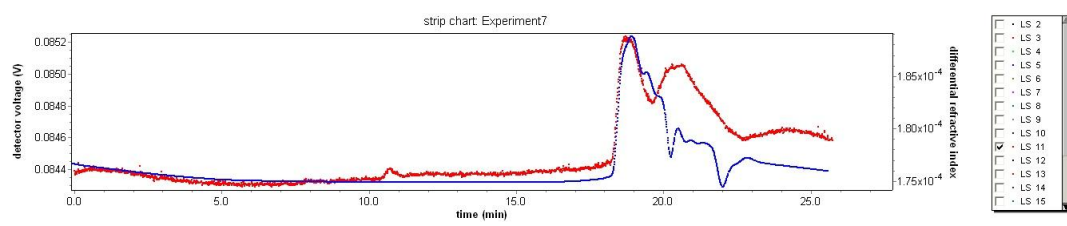

### GPC of PND with 10mol% PtBr<sub>2</sub>

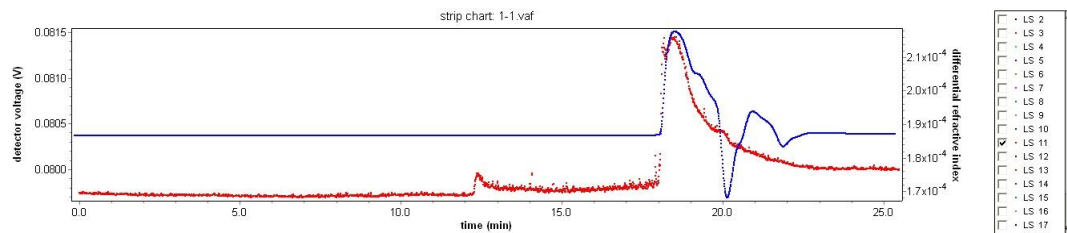

### GPC of PND with 15mol% PtBr<sub>2</sub>

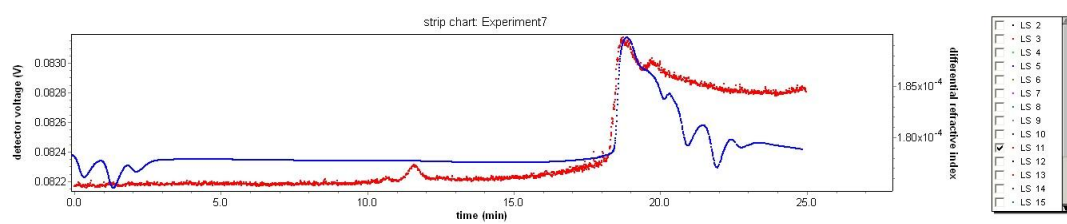

Supplement: c3cc49203f1.pdf [file c3cc49203f1.pdf]
